# Supplementary material for: Spanish Version of the Scale “Eventos Adversos Associados às Práticas de Enfermagem” (EAAPE): Validation in Nursing Students
Source: MDPI journal article supplement (doi:10.3390/nursrep12010012), 2022-02-14
Supplement: s1 [file s1]

**Supplementary Material Table S1.** Portuguese, Spanish and English versions of EAAPE.

|          |        | PORTUGUESE VERSION<br>(original) |                                                                                                |                                      | SPANISH VERSION                                                                                            |                                             | ENGLISH<br>TRANSLATION                                                                                        |
|----------|--------|----------------------------------|------------------------------------------------------------------------------------------------|--------------------------------------|------------------------------------------------------------------------------------------------------------|---------------------------------------------|---------------------------------------------------------------------------------------------------------------|
| SUBSCALE | CODE   | CATEGORIA                        | ITEM                                                                                           | CATEGORIA                            | ITEM                                                                                                       | CATEGORY                                    | ITEM                                                                                                          |
| II       | Vig. 1 | Vigilância/Julgamento clínico    | Os doentes são adequadamente vigiados                                                          | Vigilância /Seguimiento clínico      | Los pacientes están correctamente vigilados                                                                | Surveillance / Clinical monitoring-tracking | Patients are properly monitored                                                                               |
| II       | Vig. 2 |                                  | As alterações do estado clínico são oportunamente detectadas                                   |                                      | Las alteraciones en el estado clínico son adecuadamente detectadas                                         |                                             | Alterations in clinical status are adequately detected                                                        |
| I        | Vig. 3 |                                  | Existe risco de agravamento/complicações do estado do doente por défice de vigilância          |                                      | Existe riesgo de que el estado del paciente sufra complicaciones o empeoramiento por déficit de vigilancia |                                             | There is a risk that the patient's condition may suffer complications or worsen due to a lack of surveillance |
| I        | Vig. 4 |                                  | Existe risco de agravamento/complicações do estado do doente por julgamento clínico inadequado |                                      | Existe riesgo de agravamiento/complicaciones del estado del paciente por seguimiento clínico inadecuado    |                                             | There is a risk of worsening / complications of the patient's condition due to inadequate clinical monitoring |
| II       | Def. 1 | Advocacia                        | Os enfermeiros assumem-se como verdadeiros “advogados” dos interesses do doente e família      | Defensa de los derechos del paciente | Las/los enfermeras/os se erigen como verdaderas/os “defensores” de los intereses del paciente y la familia | Defense of patient rights                   | Nurses stand as true "defenders" of the patients and families' interests                                      |
| -        | Def. 2 |                                  | Os enfermeiros questionam a prática de outros                                                  |                                      | Las/los enfermeras/os cuestionan la práctica de otros profesionales cuando                                 |                                             | Nurses question other professionals' practice                                                                 |

|    |       |        |                                                                                                                                |        |                                                                                                                                               |       |                                                                                                                                                  |
|----|-------|--------|--------------------------------------------------------------------------------------------------------------------------------|--------|-----------------------------------------------------------------------------------------------------------------------------------------------|-------|--------------------------------------------------------------------------------------------------------------------------------------------------|
|    |       |        | profissionais quando está em causa o interesse do doente                                                                       |        | está en juego el interés del paciente                                                                                                         |       | when the interest of the patient is at stake                                                                                                     |
| II | Def 3 |        | Os enfermeiros respeitam a privacidade do doente                                                                               |        | Las/los enfermeras/os respetan la privacidad del paciente                                                                                     |       | Nurses respect patient privacy                                                                                                                   |
| II | Def 4 |        | Os enfermeiros respeitam a confidencialidade do doente                                                                         |        | Las/los enfermeras/os respetan la confidencialidad del paciente                                                                               |       | Nurses respect patient confidentiality                                                                                                           |
| I  | Def 5 |        | Os enfermeiros delegam funções de enfermagem noutros profissionais menos preparados                                            |        | Las/los enfermeras/os delegan funciones de enfermería en otros profesionales menos preparados                                                 |       | Nurses delegate nursing functions to other less trained professionals                                                                            |
| I  | Def 6 |        | Existe risco de agravamento/complicações no estado do doente por falhas na defesa dos interesses do doente.                    |        | Existe riesgo de agravamiento/complicaciones del estado del paciente por falta de defensa de los intereses del paciente                       |       | There is a risk of aggravation/complications of the patient's condition due to lack of defense of the patient's interests                        |
| I  | Def 7 |        | Existe risco de agravamento/complicações no estado do doente por delegação de funções de enfermagem em pessoal menos preparado |        | Existe riesgo de agravamiento/complicaciones del estado del paciente por la delegación de funciones de enfermería en personal menos preparado |       | There is a risk of aggravation/complications of the patient's condition due to the delegation of nursing functions to less-trained professionals |
| II | Ca 1  | Quedas | O risco de quedas é avaliado em todos os doentes, de acordo com protocolo instituído.                                          | Caídas | El riesgo de caídas es evaluado en todos los pacientes de acuerdo con el protocolo establecido.                                               | Falls | According to the established protocol, the risk of falls is evaluated in all patients.                                                           |

|    |       |                    |                                                                                                                                                                                                                               |                     |                                                                                                                                                                                                                                    |                 |                                                                                                                                                                                                                                                 |
|----|-------|--------------------|-------------------------------------------------------------------------------------------------------------------------------------------------------------------------------------------------------------------------------|---------------------|------------------------------------------------------------------------------------------------------------------------------------------------------------------------------------------------------------------------------------|-----------------|-------------------------------------------------------------------------------------------------------------------------------------------------------------------------------------------------------------------------------------------------|
| II | Ca 2  |                    | Os procedimentos de prevenção de quedas são ajustados tendem em consideração a avaliação do risco                                                                                                                             |                     | Los procedimientos de prevención de caídas se ajustan teniendo en cuenta la evaluación del riesgo.                                                                                                                                 |                 | Fall prevention procedures are adjusted with the risk assessment in mind.                                                                                                                                                                       |
| II | Ca 3  |                    | A vigilância do doente é ajustada ao risco avaliado                                                                                                                                                                           |                     | La vigilancia del paciente se ajusta al riesgo evaluado                                                                                                                                                                            |                 | Patient surveillance is adjusted to the assessed risk                                                                                                                                                                                           |
| I  | Ca 4  |                    | Existe risco de ocorrência de quedas de doentes                                                                                                                                                                               |                     | Existe riesgo de caídas en los pacientes                                                                                                                                                                                           |                 | There is a risk of falls in patients                                                                                                                                                                                                            |
| I  | Ca 5  |                    | Ocorrem quedas de doentes                                                                                                                                                                                                     |                     | Se producen caídas de los pacientes.                                                                                                                                                                                               |                 | Falls of patients occur                                                                                                                                                                                                                         |
| II | Ulc 1 | Úlceras de pressão | No início do internamento é realizada uma avaliação clínica global (grau de mobilidade, incontinência urinária/fecal, alterações da sensibilidade, alterações do estado de consciência, doença vascular, estado nutricional). | Úlceras por presión | Al inicio del ingreso se realiza una evaluación clínica global (grado de movilidad, incontinencia urinaria/fecal, alteraciones de la sensibilidad, alteraciones del estado de conciencia, patología vascular, estado nutricional). | Pressure ulcers | At the beginning of the hospital admission, a global clinical evaluation is carried out (degree of mobility, urinary / fecal incontinence, alterations in sensitivity, altered state of consciousness, vascular pathology, nutritional status). |
| II | Ulc 2 |                    | É realizada a inspeção periódica da pele em áreas de risco ou de úlceras prévias                                                                                                                                              |                     | Se realiza la inspección periódica de la piel en zonas de riesgo o de úlceras previas.                                                                                                                                             |                 | Periodic skin inspection is carried out in areas of risk or previous ulcers.                                                                                                                                                                    |
| II | Ulc 3 |                    | São utilizadas escalas de estratificação do risco (escalas de Braden e/ou de Norton)                                                                                                                                          |                     | Se utilizan escalas de estratificación de riesgo (escalas de Braden y/o de Norton).                                                                                                                                                |                 | Risk stratification scales are used (Braden and / or Norton scales).                                                                                                                                                                            |

|    |            |           |                                                                       |            |                                                                               |            |                                                               |
|----|------------|-----------|-----------------------------------------------------------------------|------------|-------------------------------------------------------------------------------|------------|---------------------------------------------------------------|
| II | Ulc<br>4   |           | São implementadas medidas preventivas ajustadas aos factores de risco |            | Se implementan medidas preventivas ajustadas a los factores de riesgo.        |            | Preventive measures adjusted to risk factors are implemented. |
| II | Ulc<br>5   |           | Os cuidados gerais à pele são adequados às necessidades identificadas |            | Los cuidados generales de la piel se adecúan a las necesidades identificadas. |            | General skin care is tailored to the identified needs.        |
| II | Ulc<br>6   |           | O suporte nutricional é ajustado às necessidades                      |            | El soporte nutricional se ajusta a las necesidades.                           |            | Nutritional support is tailored to need.                      |
| II | Ulc<br>7   |           | Os posicionamentos são ajustados às necessidades                      |            | Las posiciones/movilizaciones se ajustan a las necesidades de la persona      |            | Positions / mobilizations are adjusted to the patient's needs |
| I  | Ulc<br>8   |           | Existe o risco de ocorrência de úlceras de pressão                    |            | Existe riesgo de aparición de úlceras por presión.                            |            | There is a risk of the pressure ulcers' onset.                |
| I  | Ulc<br>9   |           | Ocorrem úlceras de pressão                                            |            | Aparecen úlceras por presión.                                                 |            | Pressure ulcers appear.                                       |
| I  | Med<br>1   | Medicação | Existe o risco de ocorrência de erros de medicação                    | Medicación | Existe el riesgo de aparición de errores en la medicación.                    | Medication | There is a risk of medication errors.                         |
| I  | Med<br>2   |           | Ocorrem erros de medicação                                            |            | Se producen errores en la medicación                                          |            | Medication errors occur                                       |
|    |            |           | Ocorrem erros na preparação da medicação por                          |            | Se producen errores en la preparación de la medicación por:                   |            | Errors occur in the preparation of medication due to:         |
| I  | Med<br>3.1 |           | Existirem medicamentos com rótulo e embalagem semelhantes             |            | Existencia de medicamentos con nombre o envase semejantes                     |            | Existence of drugs with a similar name or packaging           |
| I  | Med<br>3.2 |           | Existirem muitos medicamentos no mesmo horário                        |            | Hay muchos medicamentos pautados en el mismo horario.                         |            | There are many medications prescribed at the same time.       |

|                                                           |            |                                                                                |                                                                                           |                                                                            |
|-----------------------------------------------------------|------------|--------------------------------------------------------------------------------|-------------------------------------------------------------------------------------------|----------------------------------------------------------------------------|
| I                                                         | Med<br>3.3 | A farmácia enviar o medicamento errado                                         | El servicio de farmacia envía un medicamento equivocado.                                  | The pharmacy service sends the wrong medicine.                             |
| I                                                         | Med<br>3.4 | O medicamento não estar disponível em tempo oportuno                           | El medicamento no está disponible en el momento oportuno.                                 | The drug is not available when appropriate                                 |
| I                                                         | Med<br>3.5 | O enfermeiro ser interrompido durante a actividade                             | La enfermera/el enfermero es interrumpida/o durante la actividad.                         | The nurse is interrupted during the activity.                              |
| I                                                         | Med<br>3.6 | Distracção do enfermeiro                                                       | Distracción de la enfermera/del enfermero.                                                | Nurse distraction.                                                         |
| Ocorrem erros na administração da medicação por:          |            |                                                                                |                                                                                           |                                                                            |
| Se producen errores en la administración de fármacos por: |            |                                                                                |                                                                                           |                                                                            |
| Errors in drug administration occur due to:               |            |                                                                                |                                                                                           |                                                                            |
| I                                                         | Med<br>4.1 | Falhas na comunicação sobre mudanças na acomodação dos doentes (troca de cama) | Fallos en la comunicación sobre cambios en la ubicación de los pacientes (cambio de cama) | Failure to communicate about changes in patient location (bed change)      |
| I                                                         | Med<br>4.2 | Falhas na comunicação médico/enfermeiro sobre alterações na prescrição médica  | Fallos en la comunicación medico/a-enfermera/o sobre modificaciones en la prescripción    | Failures in doctor-nurse communication or about prescription modifications |
| I                                                         | Med<br>4.3 | Falhas na comunicação (prescrição médica oral ou por telefone)                 | Fallos en la comunicación (prescripción médica oral o por teléfono)                       | Communication failures (oral or telephone prescription)                    |

|   |         |                                                 |                                                                       |                                                   |                                                                             |                                        |                                                                       |
|---|---------|-------------------------------------------------|-----------------------------------------------------------------------|---------------------------------------------------|-----------------------------------------------------------------------------|----------------------------------------|-----------------------------------------------------------------------|
| I | Med 4.4 |                                                 | Falhas na comunicação (ausência de registo da administração anterior) |                                                   | Fallos en la comunicación (fallo de registro de la administración anterior) |                                        | Communication failures (previous administration registration failure) |
| I | Med 4.5 |                                                 | Incorrecta identificação do medicamento preparado                     |                                                   | Incorrecta identificación del medicamento preparado.                        |                                        | Incorrect identification of the prepared medicine.                    |
| I | Med 4.6 |                                                 | Incumprimento dos procedimentos de identificação do doente            |                                                   | Incumplimiento de los procedimientos de identificación del paciente.        |                                        | Breach of patient identification procedures.                          |
| I | Med 4.7 |                                                 | Falhas na execução da técnica de administração                        |                                                   | Fallos en la ejecución de la técnica de administración.                     |                                        | Failures in the execution of the administration technique.            |
|   |         |                                                 | Vigilância da medicação                                               |                                                   | Control de la medicación                                                    |                                        | Medication control                                                    |
| I | Med 5.1 |                                                 | Ocorrem falhas na vigilância dos ritmos das perfusões                 |                                                   | Se producen errores en la vigilancia de los ritmos de perfusión.            |                                        | Errors occur in monitoring perfusion rhythms.                         |
| I | Med 5.2 |                                                 | Ocorrem falhas na vigilância dos efeitos da medicação                 |                                                   | Se producen errores en la vigilancia de los efectos de la medicación.       |                                        | Errors occur in monitoring the effects of medication.                 |
| I | Inf 1   | Infecção associada aos cuidados de saúde (IACS) | Existe risco de ocorrerem infeções (IACS)                             | Infección asociada a los cuidados de salud (IACS) | Existen riesgos de que se produzcan infecciones                             | Healthcare associated infection (HAIs) | There are risks of infection                                          |
| I | Inf 2   |                                                 | Ocorrem infeções (IACS)                                               |                                                   | Se producen infecciones asociadas a los cuidados de salud.                  |                                        | Infections associated with health care occur.                         |
|   |         |                                                 | A Higienização das mãos realiza-se:                                   |                                                   | El lavado de manos se realiza                                               |                                        | Hand washing is done:                                                 |

|    |         |                                                                                                                                                                 |                                                                                                                                                  |                                                                                                                        |
|----|---------|-----------------------------------------------------------------------------------------------------------------------------------------------------------------|--------------------------------------------------------------------------------------------------------------------------------------------------|------------------------------------------------------------------------------------------------------------------------|
| II | Inf 3.1 | Antes e após o contacto com o doente                                                                                                                            | Antes y después del contacto con el paciente.                                                                                                    | Before and after contact with the patient.                                                                             |
| II | Inf 3.2 | Antes de procedimentos que exijam assepsia                                                                                                                      | Antes de procedimientos que exijan asepsia.                                                                                                      | Before procedures that require asepsis.                                                                                |
| II | Inf 3.3 | Após o contacto com sangue e fluidos corporais                                                                                                                  | Después del contacto con sangre o fluidos corporales.                                                                                            | After contact with blood or body fluids.                                                                               |
| II | Inf 4   | Os Equipamento de Protecção Individual (EPI) são seleccionados e ajustados aos procedimentos a realizar                                                         | Los Equipos de Protección Individual (EPI) se seleccionan y ajustan a los procedimientos a realizar.                                             | The Personal Protective Equipment (PPE) is selected and adjusted to the procedures carried out.                        |
| II | Inf 5   | Na manipulação de material corto/perfurante são evitados procedimentos inadequados, nomeadamente dobrar ou recapsular agulhas, após a sua utilização            | En la manipulación del material cortopunzante se evitan procedimientos inadecuados como doblar o recapsular agujas, tras su utilización.         | When handling medical sharps, inappropriate procedures such as bending or encapsulating needles are avoided after use. |
| II | Inf 6   | Os objectos cortam/perfurantes (agulhas, lâminas de bisturi, etc.) são acondicionados em contentores rígidos, localizados próximo da realização do procedimento | Los objetos cortopunzantes (agujas, hojas de bisturí, etc.) son depositados en contenedores rígidos, localizados cerca del lugar de utilización. | Sharps (needles, scalpel blades, etc.) are deposited in rigid containers near the place of use.                        |
| II | Inf 7   | A acomodação dos doentes realiza-se de acordo com a susceptibilidade imunológica e condição clínica do doente (ex.                                              | La ubicación de los pacientes se realiza de acuerdo con la susceptibilidad inmunológica y condición clínica del paciente (ej.                    | The placement of patients is made according to the immunological susceptibility and clinical condition of the patient  |

|    |        |                                  |                                                                                                                                                                                                                                           |                                     |                                                                                                                                                                                                                                                       |                    |                                                                                                                                                                                                                           |
|----|--------|----------------------------------|-------------------------------------------------------------------------------------------------------------------------------------------------------------------------------------------------------------------------------------------|-------------------------------------|-------------------------------------------------------------------------------------------------------------------------------------------------------------------------------------------------------------------------------------------------------|--------------------|---------------------------------------------------------------------------------------------------------------------------------------------------------------------------------------------------------------------------|
|    |        |                                  | isolamento de acordo com as necessidades)                                                                                                                                                                                                 |                                     | Aislamiento de acuerdo con las necesidades)                                                                                                                                                                                                           |                    | (e.g., isolation according to needs)                                                                                                                                                                                      |
| II | Inf 8  |                                  | Os resíduos hospitalares são objecto de tratamento apropriado, consoante o grupo a que pertencem<br>A roupa suja é triada junto do local de proveniência, acondicionada em saco próprio e transportada para a lavandaria em carro fechado |                                     | Los residuos hospitalarios son objeto del tratamiento apropiado, en función del grupo al que pertenece.<br>La ropa sucia es clasificada en el lugar de procedencia, acondicionada en bolsa apropiada y transportada a la lavandería en carro cerrado. |                    | Hospital waste is subject to appropriate treatment, depending on the group to which it belongs.<br>Dirty clothes are classified at origin, packed in an appropriate bag, and transported to the laundry in a closed cart. |
| II | Inf 9  |                                  |                                                                                                                                                                                                                                           |                                     |                                                                                                                                                                                                                                                       |                    |                                                                                                                                                                                                                           |
| I  | P.G. 1 | Percepção Geral (no meu serviço) | A ocorrência de eventos adversos associados às práticas de enfermagem compromete a segurança do doente                                                                                                                                    | Percepción General (en mi servicio) | La aparición de eventos adversos asociados a la práctica de enfermería compromete la seguridad del paciente.                                                                                                                                          | General perception | The appearance of adverse events associated with nursing practice compromises patient safety.                                                                                                                             |
| -  | P.G. 2 |                                  | Os eventos adversos associados às práticas de enfermagem podiam ser evitados                                                                                                                                                              |                                     | Los eventos adversos asociados a la práctica pueden ser evitados.                                                                                                                                                                                     |                    | Adverse events associated with the practice can be avoided.                                                                                                                                                               |
